# Supplementary material for: Single-cell RNA-Seq reveals transcriptional heterogeneity and immune subtypes associated with disease activity in human myasthenia gravis
Source: PubMed Central journal article supplement (PMC8440681; doi:10.1038/s41421-021-00314-w), 2021-09-14
Supplement: 41421_2021_314_MOESM1_ESM.pdf [file 41421_2021_314_MOESM1_ESM.pdf]

# Supplement

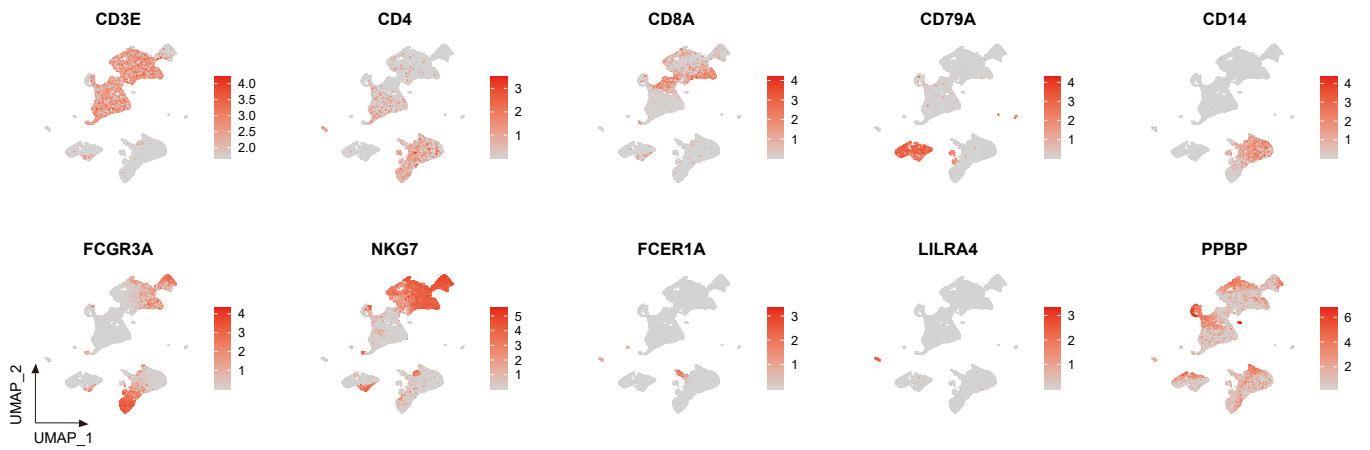

Fig. S1 UMAP projections of well-known marker genes

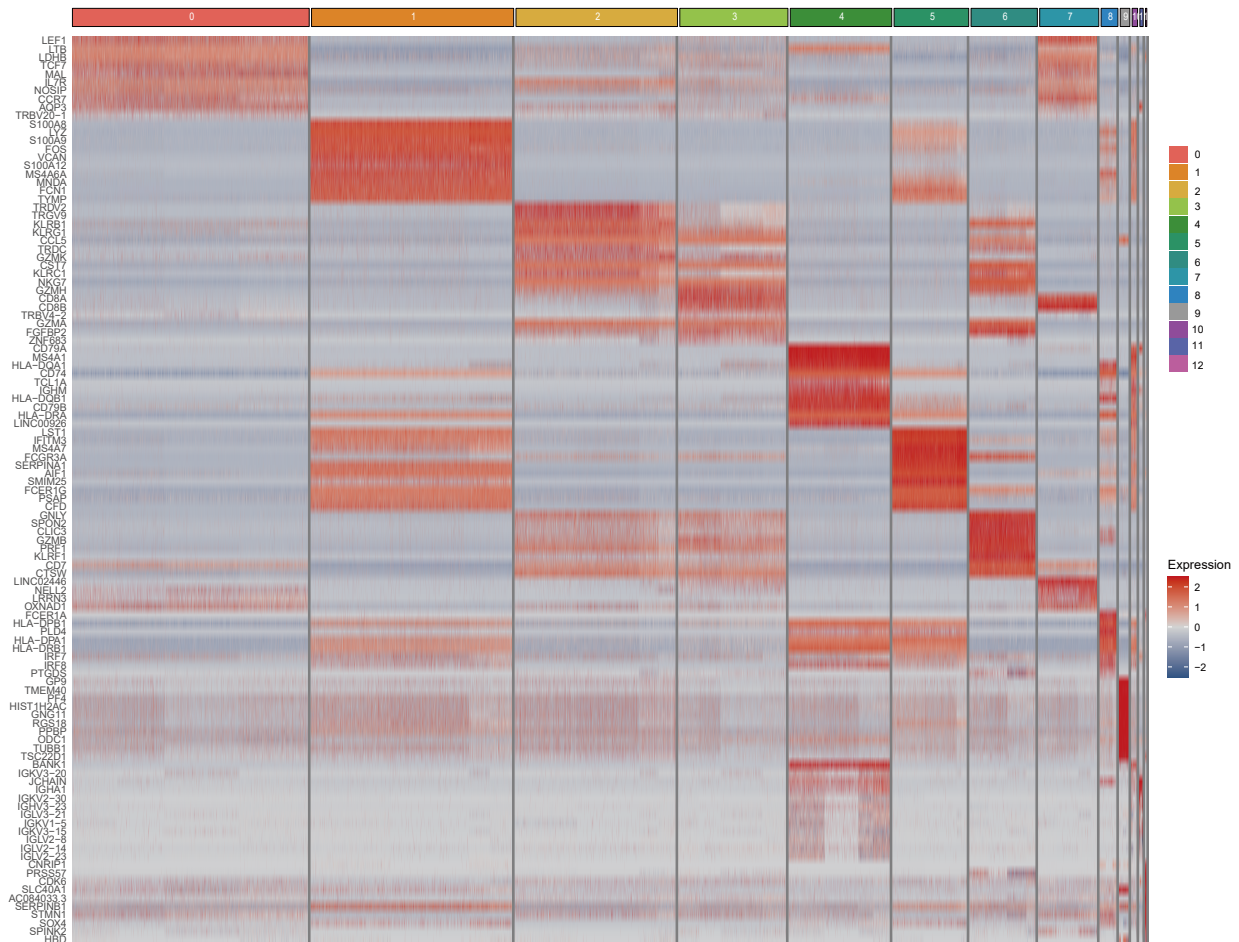

Fig. S2 A heatmap shows genes (rows) that are differentially expressed across 13 individual clusters (columns). Red: high expression; blue: low expression.

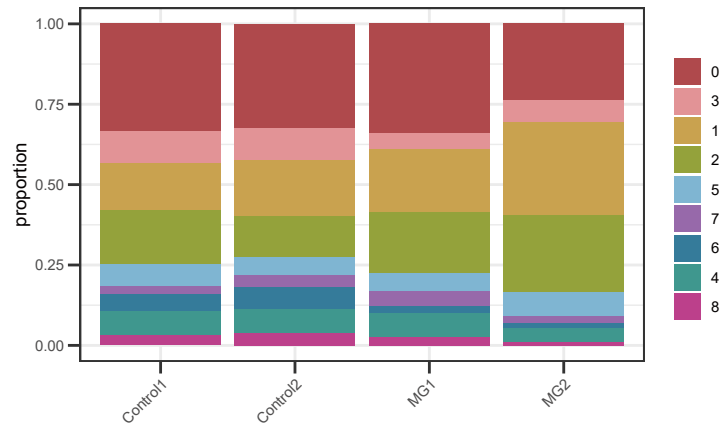

Fig.S3 Cluster abundances across all samples

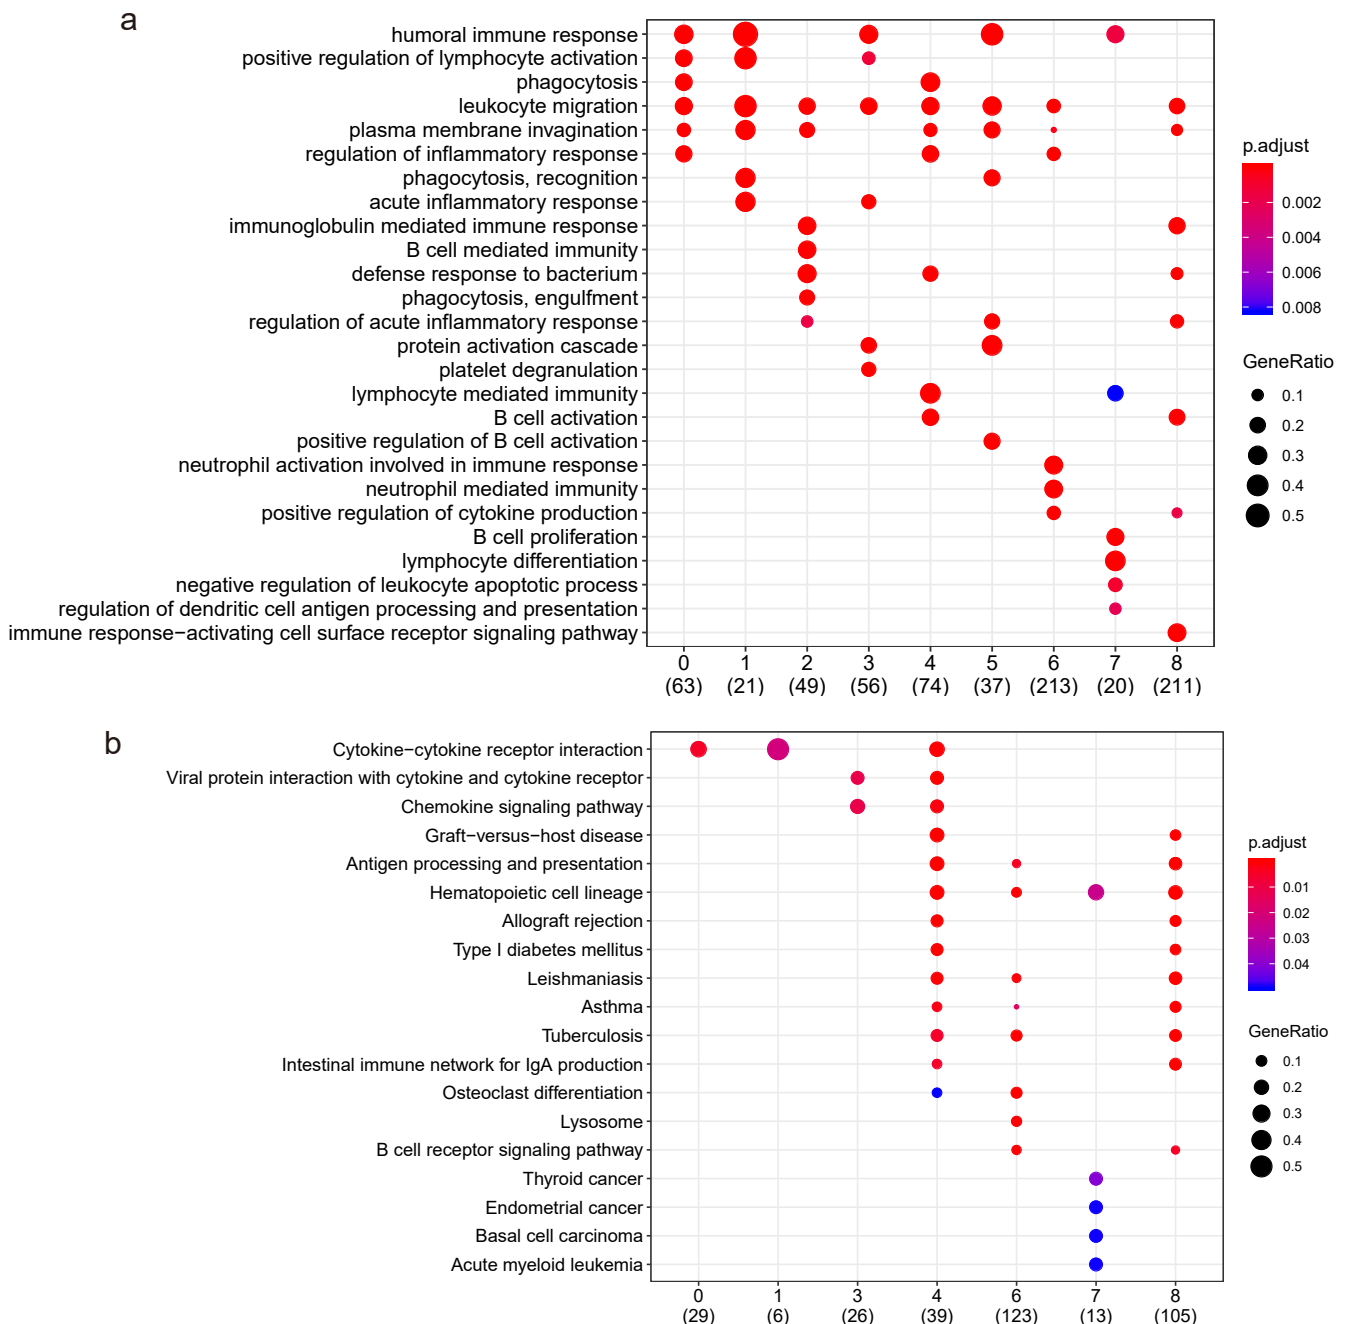

Fig. S4 GO analysis (a) and KEGG enrichment analysis (b) for B cell subsets. 0-8 represent cluster 0-8.



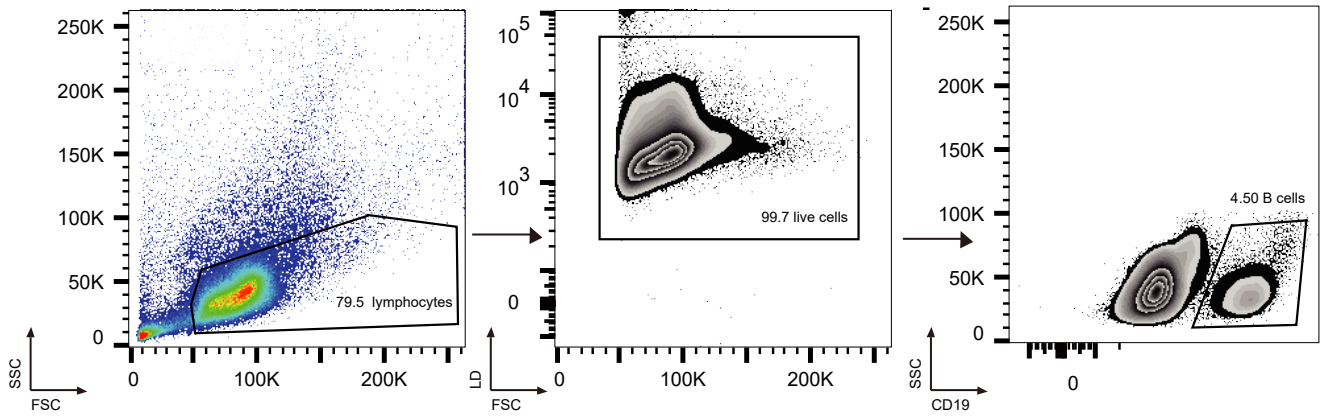

Fig. S5 Gating strategy for B cell flow cytometry

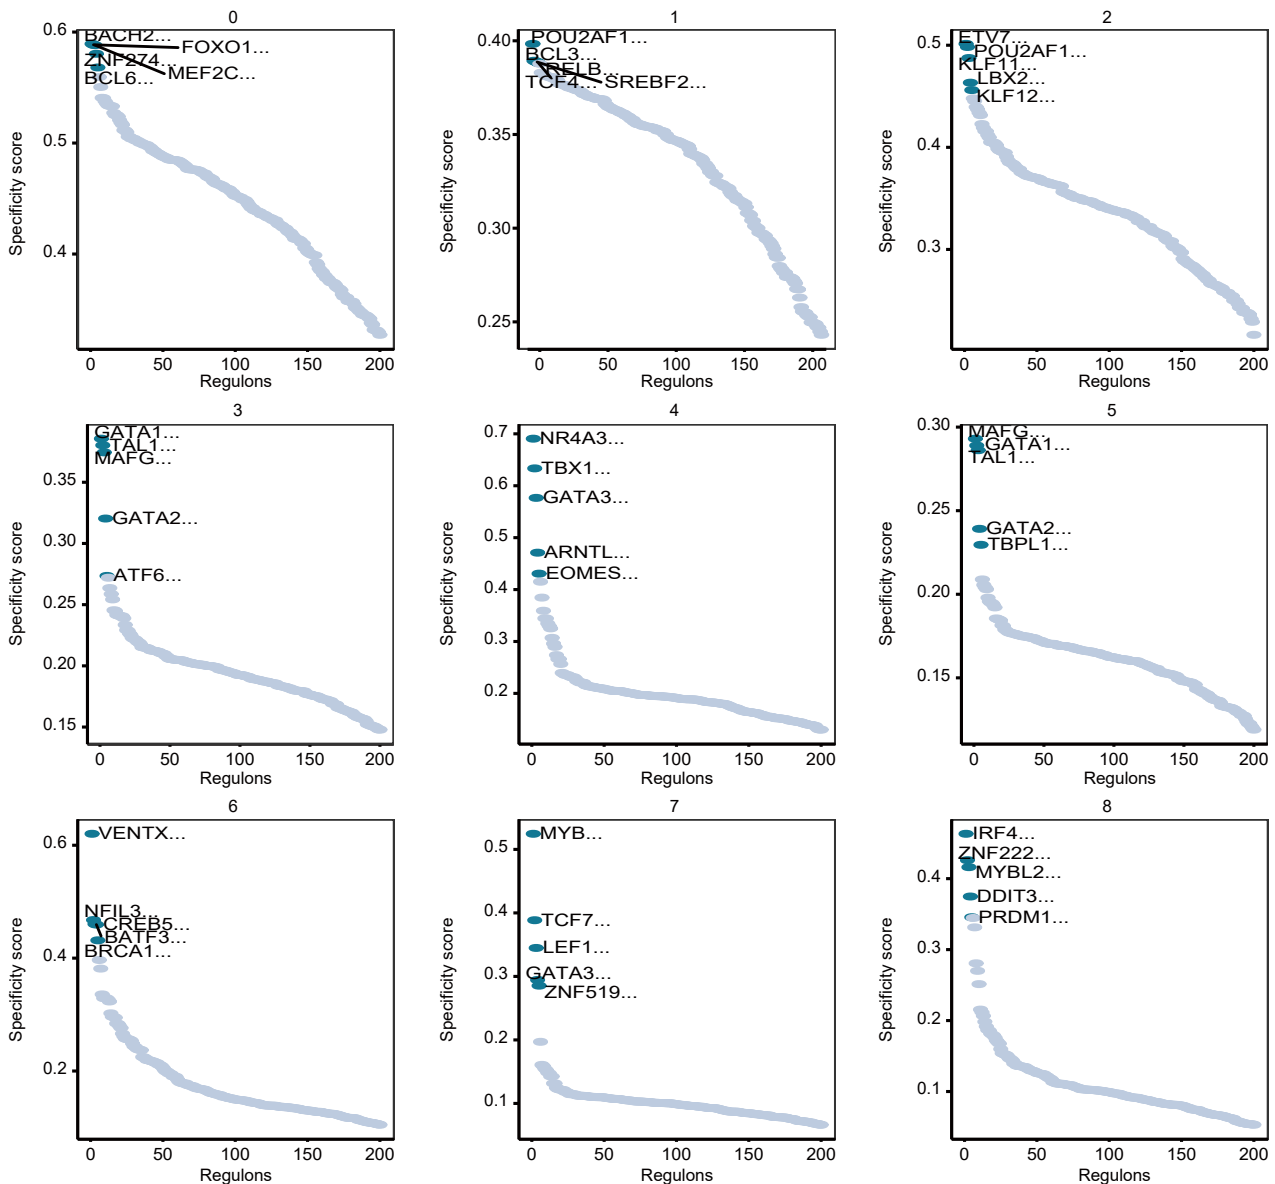

Fig. S6 Cell-Type-Specific Regulon Activity Analysis for B cell subsets. Rank for regulons in B cell based on regulon specificity score (RSS). Regulon specificity score (RSS) is calculated based on Jensen-Shannon Divergence.[1] 0-8 represent cluster 0-8.

1. Suo, S., Q. Zhu, A. Saadatpour, et al., "Revealing the Critical Regulators of Cell Identity in the Mouse Cell Atlas" Cell Rep, vol. 25, no. (6), pp. 1436-1445.e3,2018.

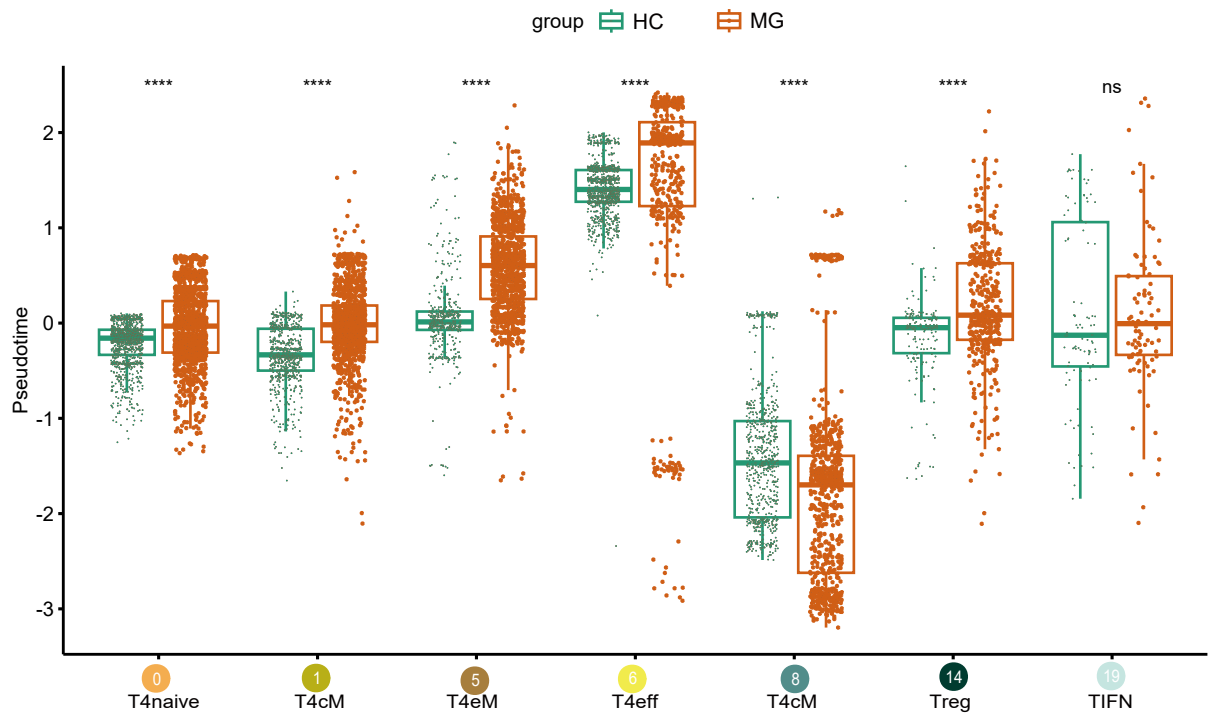

Fig. S7 Boxplot of pseudotime values of CD4<sup>+</sup> T cell subsets between HCs and MG patients. \* indicates a significant difference between HC and MG pseudotime value distribution ( Wilcoxon rank sum test)

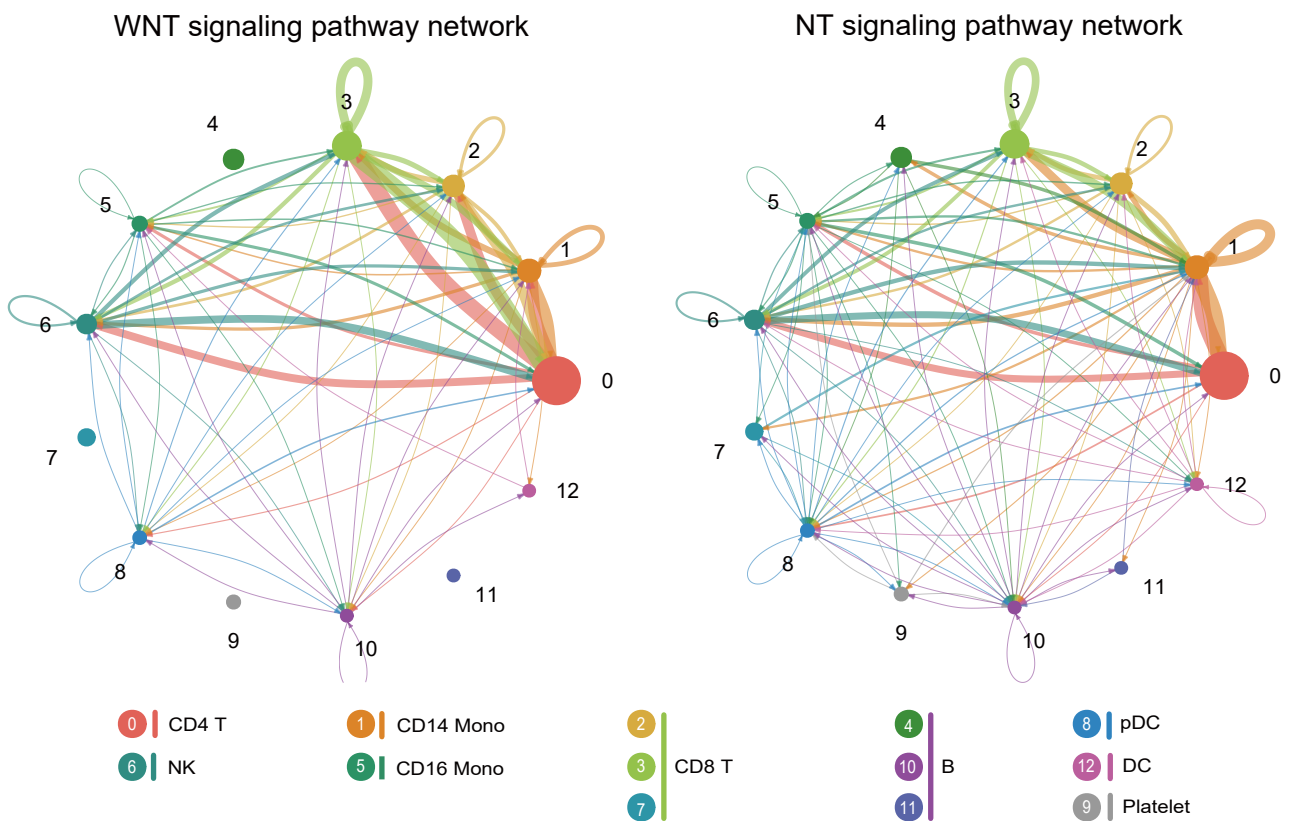

Fig. S8 Circos plot showing the inferred intercellular communication network of WNT/NT signaling pathway across major cell types in MG patients using the color of Fig. 1b.

Supplemental table 1

Demographic characteristics of study populations

| Study cohorts | Subject         | Case No. | Sex (M/F) | Age (range) | OMG | GMG | QMG score(mean±SD) | AChR-Ab positive | Thymoma |
|---------------|-----------------|----------|-----------|-------------|-----|-----|--------------------|------------------|---------|
| I             | HC              | 2        | 0/2       | 37 (22-52)  |     |     |                    |                  |         |
|               | MG              | 2        | 0/2       | 33 (18-48)  | 0   | 2   | 8±1.41             | 2                | 0       |
| II            | HC              | 15       | 7/8       | 24 (20-64)  |     |     |                    |                  |         |
|               | MG <sup>a</sup> | 60       | 26/34     | 39(14-81)   | 21  | 39  | 9.9 ± 7.0          | 41               | 3       |

a 7 MG patients from cohort II were follow-up 3 months after immunosuppressants treatment

OMG, ocular myasthenia gravis; GMG, generalized myasthenia gravis; HC, healthy controls

AChR-Ab, nicotinic acetylcholine receptor antibody; MuSK-Ab, muscle specific tyrosine kinase antibody

Supplemental table 2

| <b>Name</b>                                           | <b>control1</b> | <b>control2</b> | <b>mg1</b> | <b>mg2</b> |
|-------------------------------------------------------|-----------------|-----------------|------------|------------|
| <b>Estimated Number of Raw Cells</b>                  | 15066           | 15276           | 10004      | 10122      |
| <b>Mean Reads per Cell</b>                            | 18745           | 17934           | 31070      | 34872      |
| <b>Median Genes per Cell</b>                          | 1116            | 1148            | 1499       | 1203       |
| <b>Number of Reads</b>                                | 28240818        | 27395811        | 3.11E+0    | 3.53E+0    |
|                                                       | 8               | 3               | 8          | 8          |
| <b>Valid Barcodes</b>                                 | 94.00%          | 93.70%          | 92.70%     | 93.50%     |
| <b>Sequencing Saturation</b>                          | 73.20%          | 70.00%          | 78.10%     | 83.00%     |
| <b>Q30 Bases in Barcodes</b>                          | 94.60%          | 94.40%          | 94.50%     | 97.00%     |
| <b>Q30 Bases in RNA Read</b>                          | 91.80%          | 91.60%          | 91.80%     | 95.40%     |
| <b>Q30 Bases in RNA Read2</b>                         | 88.60%          | 88.40%          | 88.10%     | 93.80%     |
| <b>Q30 Bases in UMI</b>                               | 94.20%          | 94.00%          | 94.20%     | 96.50%     |
| <b>Reads Mapped to Genome</b>                         | 92.30%          | 91.50%          | 91.80%     | 94.10%     |
| <b>Reads Mapped Confidently to Genome</b>             | 88.80%          | 87.70%          | 86.10%     | 88.80%     |
| <b>Reads Mapped Confidently to Intergenic Regions</b> | 6.00%           | 6.20%           | 6.80%      | 7.60%      |
| <b>Reads Mapped Confidently to Intronic Regions</b>   | 8.00%           | 7.80%           | 6.50%      | 7.10%      |
| <b>Reads Mapped Confidently to Exonic Regions</b>     | 77.30%          | 76.00%          | 75.00%     | 76.70%     |
| <b>Reads Mapped Confidently to Transcriptome</b>      | 72.00%          | 70.90%          | 69.80%     | 71.70%     |
| <b>Reads Mapped Antisense to Gene</b>                 | 2.60%           | 2.50%           | 2.60%      | 2.30%      |
| <b>Fraction Reads in Cells</b>                        | 92.40%          | 91.90%          | 93.10%     | 91.10%     |
| <b>Total Genes Detected</b>                           | 20356           | 20438           | 19989      | 19855      |
| <b>Median UMI Counts per Cell</b>                     | 2755            | 2885            | 4000       | 3445       |
| <b>Cells after Filtering</b>                          | 12320           | 12369           | 8013       | 6541       |
